# 1      **Population dynamics and transcriptomic responses of *Pseudomonas*** 2      ***aeruginosa* in a complex laboratory microbial community**

3      Yingying Cheng<sup>\*1</sup>, Joey Kuok Hoong Yam<sup>1</sup>, Zhao Cai<sup>1</sup>, Yichen Ding<sup>1</sup>, Lian-Hui Zhang<sup>2</sup>, Yinyue  
4      Deng<sup>3</sup>, Liang Yang<sup>\*1,4</sup>

5      1. Singapore Centre for Environmental Life Sciences Engineering (SCELS), Nanyang Technological  
6      University, Singapore 637551

7      2. Guangdong Province Key Laboratory of Microbial Signals and Disease Control, Integrative  
8      Microbiology Research Centre, South China Agricultural University, Guangzhou, China 510642

9      3. Guangdong Innovative and Entrepreneurial Research Team of Sociomicrobiology Basic Science and  
10      Frontier Technology, South China Agricultural University, Guangzhou, China 510642

11      4. School of Biological Sciences, Nanyang Technological University, Singapore 637551

12

13

14      Corresponding author\*:

15      Liang Yang

16      Singapore Centre for Environmental Life Sciences Engineering

17      Nanyang Technological University, Singapore 637551

18      Tel: (65) 6592-3085

19      E-mail: [yangliang@ntu.edu.sg](mailto:yangliang@ntu.edu.sg)

20      Yingying Cheng

21      Singapore Centre for Environmental Life Sciences Engineering

22      Nanyang Technological University, Singapore 637551

23      Tel: (65) 6592-7716

24      E-mail: [yycheng@ntu.edu.sg](mailto:yycheng@ntu.edu.sg)

# **Abstract**

*Pseudomonas aeruginosa* is one of the dominant species when it co-exists with many other bacterial species in diverse environments. To understand its physiology and interactions with co-existing bacterial species in different conditions, we established physiologically reproducible eighteen-species communities, and found that *P. aeruginosa* became the dominant species in mixed-species biofilm community but not in the planktonic community. *P. aeruginosa* H1 type VI secretion system was highly induced in the mixed-species biofilm community compare to its mono-species biofilm, which was further demonstrated to play a key role for *P. aeruginosa* to gain fitness over other bacterial species. In addition, the type IV pili and Psl exopolysaccharide were shown to be required for *P. aeruginosa* to compete with other bacterial species in the biofilm community. Our study showed that the physiology of *P. aeruginosa* is strongly affected by interspecies interactions, and both biofilm determinants and H1 type VI secretion system contribute to *P. aeruginosa* fitness over other species in complex biofilm communities.

## Importance

*Pseudomonas aeruginosa* usually coexists with different bacterial species in natural environment. However, systematic comparative characterization of *P. aeruginosa* in complex microbial communities with its mono-species communities is lacking. We constructed mixed-species planktonic and biofilm communities consisting *P. aeruginosa* and seventeen other bacterial species to study the physiology and interaction of *P. aeruginosa* in complex multiple-species community. A single molecule detection platform, NanoString nCounter® 16S rRNA array, was used to shown that *P. aeruginosa* can become the dominant species in the biofilm communities while not in the planktonic communities. Comparative transcriptomic analysis and fluorescence-based quantification further revealed that *P. aeruginosa* H1 type VI secretion system and biofilm determinants are both required for its fitness in mixed-species biofilm communities.

**Key words:** *Pseudomonas aeruginosa*, mixed-species biofilm, Type VI secretion system, Psl exopolysaccharide, Type IV pili, fitness

## 72 Introduction

73 Biofilm can protect bacteria from hostile environment and also disperse bacteria to colonize  
 74 in new niches (1, 2). *Pseudomonas aeruginosa* is a model organism for studying biofilm  
 75 formation in Gram-negative bacteria (1, 3). Type IV pili (T4P), flagellar, iron uptake system,  
 76 extracellular DNA (eDNA) and Pel/Psl exopolysaccharides (EPS) are well known factors that  
 77 contribute to the development of *P. aeruginosa* mono-species biofilm (4-6). The biofilm of *P.*  
 78 *aeruginosa* makes it more difficult to treat (7, 8), thus expands its survival range in nature.  
 79 The adaptability of *P. aeruginosa* to various environments, such as water, soil, sewage, and  
 80 plants, suggests its strong competitiveness for ecological niches (4, 9, 10). For example, *P.*  
 81 *aeruginosa* is a dominant cultivable endophytic bacterium associated with *Pennisetum*  
 82 *glaucum* (11).

83 The broad spectrum adaptability of *P. aeruginosa* also hints its strong competitiveness  
 84 against various other bacterial species when in mixed-species microbial communities.  
 85 Several studies indicated that *P. aeruginosa* is able to gain fitness over other species during  
 86 its survival in either two-species or three-species co-cultures (12-14). For example, *P.*  
 87 *aeruginosa* reduces the viability of *Staphylococcus aureus* and lyses *S. aureus* cells for iron  
 88 repletion in planktonic co-cultures (15, 16). In biofilms, *P. aeruginosa* inhibits *S. epidermidis*  
 89 growth and reduces the initial adhesion of *Agrobacterium tumefaciens* through the secretion  
 90 of Psl and Pel exopolysaccharides and small diffusible molecules (17-19). *P. aeruginosa* was  
 91 shown to decrease the swarming motility of *P. putida* and therefore inhibit its biofilm  
 92 formation by producing 2-heptyl-3-hydroxy-4-quinolone (20). Quinolones secreted by *P.*  
 93 *aeruginosa* were also able to reduce biofilm maturation for a broad range of bacteria (21).  
 94 These studies proved the competitiveness of *P. aeruginosa* in mixed-species interaction  
 95 results from metabolic versatility and strong biofilm formation capacity. The known devices  
 96 for *P. aeruginosa* to implement competition including type VI secretion system (T6SS),  
 97 antibiotic, iron chelators, pyoverdine, rhamnolipid, pyocyanin, extracellular polysaccharide,

fatty acid *cis*-2-decenoic acid, proteinase and other quorum sensing system regulated virulence (22-27).

*P. aeruginosa* co-exists with many different microbial species in actual environment. However, the main competition advantage of *P. aeruginosa* in gaining fitness over other species within complex microbial communities remained unclear. Previous studies indicated that interspecies interactions in mixed-species microbial communities are complicated and involve both cooperation and competition (24, 28). Therefore, monitoring the population dynamics of *P. aeruginosa* in complex microbial communities is important for elucidating how this interaction network is established, which may provide insights into *P. aeruginosa* ecological role in complex mix-species communities.

Until now, there is a lack of robust tool to monitor the population dynamics in complex microbial communities. The high throughput digital NanoString nCounter® system has recently been used to profile the multiplexed gene expression with flexibility and sensitivity (29, 30). Here we evaluated this technology in monitoring population dynamics in a laboratory eighteen-species microbial community with current platform. We further investigated the transcriptome of *P. aeruginosa* competition in this mixed-species community in both planktonic and biofilm modes of growth.

## Results

### Establishment of the complex microbial community

Instead of proliferating as a single species culture, *P. aeruginosa* often grows as common species within mixed-species microbial communities containing many other bacterial species in natural environments as well as infection sites (31, 32). We presumed bacteria with same region colonization have chance to co-exist. To obtain a better understanding of *P. aeruginosa* physiology in complex microbial communities and evaluate the NanoString nCounter® system, we selected bacterial species that potentially co-exist with *P. aeruginosa* in different environments and can be distinguished from each other by NanoString

nCounter® probes, including both of human pathogens and environmental bacteria (Supplementary Table 1), to establish laboratorial planktonic and biofilm communities. *Acinetobacter baumannii*, *Burkholderia cenocepacia*, *Klebsiella pneumoniae* and *S. aureus* can co-infect lungs with *P. aeruginosa* (33-36); *Citrobacter amalonaticus*, *E. coli* and *Streptococcus gallolyticus* can cause intra-abdominal infections like *P. aeruginosa*; *Chromobacterium violaceum*, *S. aureus* and *Stenotrophomonas maltophilia* can infect the skin or open wounds as *P. aeruginosa* can; *Listeria monocytogenes* may colonize in host from gastrointestinal tracts as *P. aeruginosa*; *P. putida* can be isolated from infected urinary tract and infected skin as well as *P. aeruginosa*; *Bacillus subtilis*, *Elizabethkingia meningoseptica*, *P. fluorescens* and *Shewanella oneidensis* are widely distributed in natural environments as *P. aeruginosa*. *P. aeruginosa* was also isolated from plant as *P. syringae* and *Xanthomonas campestris* (37). Both of known and undiscovered natural environments are so complex and unexpected. This laboratory community may help us to understand *P. aeruginosa* real response in possible complex microbial community. Not only to investigate the ecological behaviour and physiological response of *P. aeruginosa* in our model system; we also hope to provide insights into how future studies on complex microbial communities can be shaped. We used 10% Tryptic Soy Broth (TSB) as the growth medium, which is able to support the growth of all the selected eighteen bacterial species at room temperature (Supplementary Figure 1). Although *A. baumannii*, *C. amalonaticus*, *C. violaceum*, *E. meningoseptica*, *E. coli* and *K. pneumoniae* grew relatively faster than other species, whereas *L. monocytogenes* and *S. gallolyticus* were unable to grow to a high cell density in 10% TSB, the growth curves indicated that 10% TSB is generally suitable for establishing the mixed-species microbial community for *P. aeruginosa* to grow at a comparable rate compared to these species (Supplementary Figure 1). In addition to the growth rate, the biofilm formation capacity of these bacterial species was also tested. After 24 hours of static incubation, *A. baumannii* and *K. pneumoniae* had the

highest capacity to form biofilms (Supplementary Figure 2). Among the other sixteen species, *B. cenocepacia*, *P. aeruginosa* and *S. maltophilia* have similar biofilm formation capabilities (Supplementary Figure 2). However, *B. subtilis*, *C. violaceum*, *E. meningoseptica*, *P. putida*, *P. syringae* and *S. gallolyticus* formed less biofilms in 10% TSB at room temperature (Supplementary Figure 2). In summary, the biofilm formation capacities of these eighteen species are rather different, with no linear relationship between their biofilm formation capacity and growth rates. We therefore established the planktonic and biofilm microbial communities by adjusting each species to an OD<sub>600</sub> value of 0.01 in 10% TSB medium as input.

### **Physiological reproducibility of the mixed-species microbial communities**

Before investigating the population dynamics and physiology of *P. aeruginosa* in the mixed-species communities, we employed RNA sequencing-based metatranscriptomics to examine the physiological reproducibility of both the planktonic and biofilm communities. The sequencing reads (7.8–9.2 million per sample) were assigned to 44 classified functional roles (SEED; 51.4 million reads) with unclassified reads in MEGAN6. Similar profiles of functional classifications of genes assigned to each community model by their functional properties were observed among three biological replicates (Figure 1A), indicating that both planktonic and biofilm community physiology are highly reproducible in our laboratory model (Figure 1A). In addition, the principal coordinates analysis (PCoA) confirmed that the metatranscriptome profiles of planktonic community are different from biofilm community, and the three biological replicates for each community were similar because they clustered in close proximity (Figure 1B), which suggests that the biological replicates of the mixed-species cultures have a reproducible physiology and be able to serve as functional communities in our models.

### **Evaluation of NanoString nCounter® 16S rRNA array for microbial population assay**

Although the 16S rRNA gene amplicon sequencing approach is widely used to study the microbial population diversity, it is known to have the drawback of PCR bias. A NanoString nCounter® 16S rRNA array was developed to detect unique signals from complex hybridized samples at a single molecule level by utilizing special probes and omitting the PCR amplification step (38) (Supplementary Table 1). To check the feasibility of the designed nCounter® 16S rRNA array for detecting the 16S rRNA from different bacterial species in the total RNA mixture, we mixed the total RNA extracted from fourteen individual bacterial species at different ratios in three different training groups (Table 1) and subjected them to nCounter® 16S rRNA array analysis with the total RNA from the planktonic and biofilm communities together. The other three *Pseudomonas* species were not mixed in the training groups to test the background of *Pseudomonas* probe to other species in the mixed-species community by applying this new technology. *L. monocytogenes* as gram-positive representation was not mixed to test the gram-positive bacterial background. The percentage of each species in 16S rRNA reads according to nCounter® 16S rRNA array analysis was compared to its 'actual' RNA percentage from the training groups to calculate the normalization factors for each of the fourteen species (Table 1). Table 1 shows that the nCounter® 16S rRNA array gave some species more reads than accurate 16S rRNA readings, while some other species got less reads compare to true 16S rRNA readings. This trend indicated that it is crucial to analyse the bacterial population dynamics by multiplying the normalization factors (the variation fold) (Table 1), when nCounter® 16S rRNA array is employed to reflect the true percentage of each bacterial species in a mixed-species community.

#### ***P. aeruginosa* is the dominant species in the mixed-species biofilm community**

In order to maintain the reproducibility of this laboratory model, we still use the same mixed-species community. Each individual species of bacterial cells was normalized to an OD<sub>600</sub> reading of 0.01 in the mixture and cultivated for 1 day to establish the planktonic



community, and 5 days to establish the biofilm community, and total RNA extracted from these communities were subjected to analysis by nCounter® 16S rRNA array. In the 1-day-old planktonic community, the relative abundance of *A. baumannii*, *C. violaceum* and *E. meningoseptica* increased by 2-fold or more compared to their initial inputs, whereas the relative abundance of *B. subtilis*, *P. aeruginosa*, *S. oneidensis*, *S. aureus*, *S. gallolyticus* and *X. campestris* decreased to half or less compared to their initial inputs (Figure 2 and Supplementary Table 2). Interestingly, the microbial population dynamics are quite different in the 5-day-old biofilm community compared to the planktonic community; the relative abundance of *K. pneumoniae* and *P. aeruginosa* increased to more than 4-fold their initial inputs, whereas most of the other species decreased significantly (Figure 2 and Supplementary Table 2). *P. aeruginosa* 16S rRNA constituted around 32.62% of the total 16S rRNA content while *K. pneumoniae* constituted around 26.08% of that in 5-day-old biofilms (Figure 2, and Supplementary Table 2) after adjusted by normalization factors (Table 1). The proportions of all bacterial species (including the four non-normalized ones) are summarized in Supplementary Figure 3.

To validate the observed microbial population dynamics, we used GFP-tagged *P. aeruginosa* to establish the 1-day-old planktonic community and the 5-day-old biofilm community as described above. The abundance of *P. aeruginosa* was detected and calculated using the fluorescence-proportion standard curve (Supplementary Figure 4). The fluorescence-proportion standard curve is preferred over the CFU counting approach due to the difference in the growth rates and the colony sizes of these eighteen bacterial species on plates, which compromises the accuracy of CFU counting. Figure 3A shows that the results of the biological fluorescence-proportion standard curve-based experiment correlated well with the results of the normalized nCounter® 16S rRNA array. Cells from these fluorescence-based proportion tests were resuspended and examined using confocal microscopy to verify that the proportions of *P. aeruginosa* cells in the mixed-species biofilm

community (Figure 3C) is much higher than in the planktonic community (Figure 3B). Together with the results in Figure 2, we have demonstrated that *P. aeruginosa* is the dominant species in this microbial biofilm community.

**Both the H1 Type VI secretion system and biofilm formation determinants contributed to the fitness of *P. aeruginosa* in the biofilm community**

Since *P. aeruginosa* constituted up to 32.62% of the biofilm community in contrast to only 3.81% in the planktonic community (Supplementary Table 2), we hypothesized that the important biofilm determinants are likely to contribute to the dominating competence of *P. aeruginosa* over other species in the biofilm community. To test this hypothesis, we performed a transcriptomics analysis to compare the *P. aeruginosa* gene expressions in mono-species biofilms and in the mixed-species biofilm community. Differentially expressed genes of *P. aeruginosa* in the mixed-species biofilm and mono-species biofilm are illustrated as a heat map (Figure 4A). Further clustering of the transcriptome by Principle Component Analysis (PCA) revealed that the *P. aeruginosa* maintained a distinct physiology in these two types of biofilms (Figure 4B). Based on the negative binomial test with adjusted p-value cut-off of 0.05 and a log<sub>2</sub> fold-change cut-off of 1, we found that 239 genes were upregulated and 171 genes were downregulated in *P. aeruginosa* cells in the mixed-species biofilm compared to those in mono-species biofilms (Supplementary Table 3).

Among the significantly upregulated genes of *P. aeruginosa* in the mixed-species biofilm, at least 36 genes belong to the T6SS (Table 2), which accounted for 15% of all the upregulated genes. Most of them belong to Hcp secretion island I (H1) T6SS while some are located in the Hcp secretion island II (H2) T6SS. However, there are only a few genes that belong to H3-T6SS. The ClpV protein is the energy source of T6SS (39); the expressions of *clpV1*, *clpV2* and *clpV3* belonging to three different sub-type T6SS in *P. aeruginosa* were all upregulated in the mixed-species biofilm (Table 2). To validate the transcriptomic analysis results, the  $\Delta clpV1$ ,  $\Delta clpV2$  and  $\Delta clpV3$  mutants of *P. aeruginosa* were constructed with a GFP tag and

thereafter formed biofilms with the other seventeen species. Interestingly, only the  $\Delta clpV1$  mutant was greatly impaired in terms of fitness to dominate in the mixed-species biofilms; when ClpV1 was complemented into this mutant with multiple copies, the complementary strain showed higher fitness to dominate in the mixed-species biofilm community than both wild-type PAO1 and the deletion mutant (Figure 5). This finding suggests that the H1-T6SS has a profound effect on fitness gains for *P. aeruginosa* to outcompete other species in the mixed biofilm community (Figure 5). H1-T6SS contains seven effectors to be secreted into its competitor, which are termed Tse1-7 (40, 41). Both Tse1 and Tse3, which can dissolve the target cells by degrading their peptidoglycan (26), were upregulated in the complex microbial biofilm community (Table 2). Furthermore, the expression of the gene encoding the H1-T6SS delivery-dependent proteins VgrG1 was also increased (Table 2).

In addition to T6SS, the *P. aeruginosa pelF*, *pelG*, *flgC* and *flgD* genes, which are important for its biofilm formation in mono-species cultures, were also upregulated in the mixed-species biofilms (Table 2). We next investigated the impact of the classic mono-species *P. aeruginosa* biofilm determinants, such as the Pel and Psl EPS (42-44), T4P (6, 45) and flagella (6, 45), on the fitness of *P. aeruginosa* in the mixed-species biofilms. The *P. aeruginosa* deletion mutant  $\Delta pslBCD$ ,  $\Delta pelA$ ,  $\Delta pilA$  or  $\Delta flhM$  were used to cultivate mixed-biofilms with the other seventeen bacterial species respectively. The Psl polysaccharide and T4P were found to be required for *P. aeruginosa* to predominate in the complex microbial biofilm community (Figure 5). Psl was particularly essential for bacterial colonization in the mixed-species biofilms (46), so  $\Delta pslBCD$  was completely outcompeted by other species in biofilm community (Figure 5), even though its planktonic growth was similar to that of the wild-type PAO1 strain (Supplementary Figure 5).

**Quorum sensing is not required for the fitness of *P. aeruginosa* in the mixed-species biofilm community**

Quorum sensing systems are well known to play important roles in biofilm formation both *in vitro* and *in vivo* (47-52). Previous studies showed that *P. aeruginosa* is able to outcompete other microbial species by releasing quorum sensing-regulated virulence factors, such as rhamnolipid, elastase, exotoxins, pyocyanin and pyoverdine (53-57). However, the expression of the *P. aeruginosa* quorum sensing-related genes, such as *lasA*, *lasB*, *rhIA*, *rhIB* and *pqsH*, were found to be downregulated in this biofilm community compared to its mono-species biofilm (Table 2), suggesting that quorum sensing is not important in contributing to the fitness of *P. aeruginosa* under this condition. Intriguingly, deleting the *lasR* or *mvfR* quorum sensing genes in *P. aeruginosa* even increased this species' fitness over that of other species in the mixed-species biofilms compared to the PAO1 wild type (Figure 5), which might be because *P. aeruginosa* H1-T6SS for competition was repressed by LasR and MvfR (58).

## Discussion

Our study reported on the establishment of physiologically reproducible laboratory planktonic and biofilm communities and their use in investigating how *P. aeruginosa* competes with multiple other bacterial species. We tracked the population dynamics and profiled the transcriptomes of the established communities and showed that *P. aeruginosa* maintains distinct transcriptomes in complex microbial communities compared to its mono-species cultures (Figure 4). The H1-T6SS, Psl and T4P were found to be the key components for *P. aeruginosa* to gain fitness over other species in the mixed-species biofilm communities (Figure 5 and Table 2). These pathway-involved genes, such as *clpV1* (6.8-fold), *pilA* (17.1-fold) and the *pslBCD* operon, were all significantly upregulated in the microbial biofilm community (*P. aeruginosa* is the dominant species) as compared to the planktonic cultures (*P. aeruginosa* is not the dominant species). Our results highlight the biological

significance of biofilm formation for *P. aeruginosa* to gain fitness in complex microbial communities (59), and we confirmed that H1-T6SS is a powerful weapon for *P. aeruginosa* interspecies competition within the ecological niche in bacterial communities (39, 41). Our findings on *P. aeruginosa* in the mixed-species microbial community are in accordance with previous studies in pure culture or two species mixture (18, 19, 26, 40) and suggest that Psl, T4P and H1-T6SS are potential targets to control or eliminate *P. aeruginosa* from complex microbial biofilm communities, such as the microbial consortia from medical devices.

In addition, we demonstrated the sensitivity of the single molecule detection technique, NanoString nCounter® 16S rRNA array, in monitoring the population dynamics in complex bacterial communities. Our results showed that the accuracy of this technique depends on the specificity and affinity of the probes, which need to be normalized during the calculation of population dynamics.

*P. aeruginosa* is able to dominate airway infection microbiota (60) and wound communities after the administration of antibiotics (61), suggesting that *P. aeruginosa* has a competitive physiology in mixed-species microbial communities. Our transcriptomic analysis showed that two of the primary mechanisms for *P. aeruginosa* to maintain this competitive advantage are H1-T6SS and biofilm formation, which are different from most previous reports in which many quorum sensing-regulated virulence factors, such as elastase, PQS, pyoverdine and pyocyanin, were used by *P. aeruginosa* to kill other bacteria (53-57). The reasons for this difference may be as follows: 1) *P. aeruginosa* *las* system and *pqs* system repress H1-T6SS to compete with other bacteria (58); 2) quorum sensing signalling molecules and virulence factors might function as signals to induce aggressive phenotypes from bacterial competitors

as well as hosts via cross-talk, which in turn arrests the growth of *P. aeruginosa*; 3) the high production level of quorum sensing-regulated virulence factors might consume a great deal of energy to reduce the replication of *P. aeruginosa* cells or even trigger autolysis phenotypes (62); or 4) the flow biofilm cultivation system with continued fresh medium flow through the biofilms might wash away the secreted quorum sensing signals and virulence factors and thus reduce the efficacy of quorum sensing. Thus, the cell-contact based T6SS might be the most efficient mechanism for *P. aeruginosa* to outcompete other species. This is supported by the data that loss of ClpV1 in H1-T6SS will decrease the competitive capacity of *P. aeruginosa* in our laboratory model (Figure 5). Recently, Allsopp *et al* has proved that all three T6SS in *P. aeruginosa* express more at 25°C than them at 37°C (63), however, expressed H2-T6SS and H3-T6SS did not affect *P. aeruginosa* competition capacity as H1-T6SS at room temperature in our experiment (Figure 5).

H1-T6SS is well known for its roles in competitiveness and pathogenicity in *P. aeruginosa* (26, 39). In addition to H1-T6SS, Psl and T4P are critical components of *P. aeruginosa* fitness in the mixed-species biofilm community (Figure 5). Our result is in accordance with previous research showing that secreted protein A from *S. aureus* can inhibit *P. aeruginosa* biofilm formation by binding to Psl and T4P (64). One limitation of our current study is that we have not elucidated whether *P. aeruginosa* employs T6SS, Psl and T4P sequentially or simultaneously when outcompeting the other species in the biofilm community. Additionally, further study is required to validate whether the T6SS, Psl and T4P are required by *P. aeruginosa* to outcompete other species *in vivo*. Because the amounts of bacteria from *in vivo* samples are usually low and insufficient for transcriptomic analysis, we can explore

suitable probes for the NanoString nCounter® array to examine the population dynamics and gene expression of *P. aeruginosa* from the *in vivo* communities. Moreover, *K. pneumonia* is the secondary dominant species in the biofilm co-cultures but not in planktonic co-cultures like *P. aeruginosa* (Figure 2), and it constantly co-exists with *P. aeruginosa in vitro* and *in vivo* (65). Thus, it would be interesting to study its survival mechanism in the future.

## Methods

### Bacterial strains, media and growth conditions

The bacterial species used in this study are listed in Supplementary Table 1. All these strains were revived in tryptic soy broth (TSB) agar plates and subsequently in TSB liquid medium at 30°C. Mixed-species communities were cultivated in 10% TSB at room temperature. To construct *P. aeruginosa* gene knockout mutants and green fluorescent protein (GFP)-tagged strains, AB minimal medium (66) supplemented with 10 mM citric acid supplemented with appropriate antibiotics was used to select *P. aeruginosa*. *E. coli* was grown in LB medium at 37°C. 60 µg/ml of gentamicin was used to select *P. aeruginosa*, while 15 µg/ml of gentamicin, 10 µg/ml of chloramphenicol and 100 µg/ml of ampicillin were used to select *E. coli*, when appropriate.

### Growth assay and static biofilm cultivation

Overnight cultures of each bacterial species were diluted to OD<sub>600</sub> of 0.01 in 10% TSB, 150 µl diluted culture were loaded into 96-well microtitre plates. The plates were incubated in an infinite M200PRO multimode microplate reader (Tecan Schweiz AG, Männedorf, Switzerland) at room temperature, and the OD<sub>600</sub> of each well was measured and recorded hourly. A 10% TSB blank medium was used as a negative control, and its reading has been subtracted from all the culture readings to plot the growth curves for each species.

To examine the static biofilm-forming capacities of each species, bacterial cultures were prepared using the same procedures as mentioned in growth assay. After overnight

cultivation, the planktonic cells were discarded from the microtitre plate, and the wells were washed three times using tap water to remove any residual planktonic cells. A 180 µl volume of 0.1% crystal violet (CV) solution was loaded into each well to stain the biofilm for 15 min. The excess stain in the wells was washed out with tap water three times. Finally, 180 µl of 30% acetate acid was loaded into each well to dissolve CV from the stained biofilm. The optical intensity at OD<sub>550</sub> was measured by an Infinite M200PRO multimode microplate reader to quantify the biofilms formed by each bacterial species.

### **Cultivation of the mixed-species planktonic and biofilm communities**

Overnight cultures of the eighteen individual bacterial species were diluted in 10% TSB medium and normalized to the same ratio into the primary mixture where OD<sub>600</sub> = 1. The primary mixture was then diluted to OD<sub>600</sub>=0.01 in 10% TSB, and this diluent was used as the initial inoculum for both planktonic cultures in shake flask and biofilm cultures in flow tube reactors. The 24-hour-old planktonic cultures and 5-day-old biofilm cultures were harvested for population dynamic or transcriptomic analysis.

### **RNA preparation for sequencing**

The bacterial cells were first treated with RNA Protect Reagent (Qiagen®, Germany) to maintain the integrity of RNA. The total RNA was extracted from these bacterial cells using a miRNeasy Mini Kit (Qiagen®, Germany) with modifications. A Turbo DNA-free Kit (Thermo Fisher Scientific®, Lithuania) was used to remove genomic DNA contaminant from total RNA. DNA contamination was assessed with a Qubit®dsDNA High Sensitivity (HS) assay (PicoGreen dye) and a Qubit® 2.0 Fluorometer (Invitrogen®, Austria) according to manufacturer's instructions. Ribosomal RNA was depleted with a Ribo-Zero rRNA removal Kit (Illumina, USA). The integrity of the total RNA was assessed with an Agilent TapeStation System (Agilent Technologies, UK). The Double-stranded cDNAs were reverse-transcribed using a NEBNext RNA first and second strand synthesis module (NEB®, USA). cDNAs were subjected to Illumina's TruSeq Stranded



mRNA protocol. The quantitated libraries were then pooled at equimolar concentrations and sequenced on an Illumina HiSeq2500 sequencer in rapid mode at a read-length of 100 bp paired-ends.

#### **NanoString nCounter® population analysis**

One ng of purified total RNA from the different bacterial cultures was analysed using a NanoString nCounter® Gene Expression CodeSets platform (NanoString Technologies, Inc., United States) with the customized CodeSets for our selected bacterial species (Supplementary Table 1) according to the manufacturer's protocol to obtain raw counts. The quality control assessment and raw counts were normalized and analysed using nSolver™ analysis software version 2.6 (NanoString Technologies, Inc., United States). The samples were subjected to manufacturer-recommended default parameters. The geometric mean was selected for negative control subtraction, while the geometric mean was used to compute the normalized factor for positive control normalization and the flag lane if the normalization factors were outside the 0.3 - 3 range. The experiments were performed in triplicates, and the results are presented as the means  $\pm$  S.D.

#### **Transcriptomic analysis**

The accession number for RNA-seq is SRP128411. For *P. aeruginosa* transcriptomics analysis, PAO1 genome (NC\_002516) was used as the reference with annotation from the Pseudomonas Genome Database (<http://www.pseudomonas.com/>). The RNA-Seq raw data were analysed using the "RNA-Seq and expression analysis" application in CLC genomics Workbench 10.0 (QIAGEN). The total gene reads from CLC genomics Workbench 10.0 were subjected to the DESeq2 package for statistical analysis (67) by using R/Bioconductor (68). A hierarchical clustering analysis was performed with a negative binomial test using the DESeq2 package. The heatmap.2 package was used to draw a heat map for the differentially expressed genes of *P. aeruginosa* cells with fold change larger than 2 and an adjusted

p-value smaller than 0.05. And the principal component analysis (PCA) plot was generated in R/Bioconductor.

The RNA sequences adapter-trimmed and assembled RNA sequences of the mixed-species microbial community were used as metatranscriptomics data for analysis. The sequences of the mixed-species communities grown as biofilm and planktonic cells were aligned against the NCBI non-redundant (NR) protein database using DIAMOND with default settings. The output aligned gene reads in DAA format were uploaded and meganized in MEGAN6.11.1 with a minimum bit-score of 50 and a top percentage of 25 (69). Functional analyses of these aligned gene reads were performed using SEED classifications. A Principle Coordinates Analysis (PCoA) was plotted to cluster the samples based on a functional analysis. The functional analysis results are illustrated in stacked bar charts.

### **Fluorescence-based *P. aeruginosa* population assay**

To develop a rapid *P. aeruginosa* population dynamics assay in the mixed-species cultures, a single copy of a green fluorescent protein (GFP) tag was inserted into the *P. aeruginosa* chromosome by using a mini-Tn7-Gm-gfp transposon (70). The other seventeen bacterial species without *P. aeruginosa* were used as a background control. The GFP fluorescence readings of both planktonic and biofilm cultures, with gradient proportion of GFP-tagged *P. aeruginosa* derived strains, were recorded using a Tecan infinite M200PRO microplate reader. Then the fluorescence-proportion standard curves of each tested strain were generated from these GFP readings (Supplementary Figure 4). The proportions of *P. aeruginosa* derived strains in communities can be calculated using these fluorescence-proportion standard curves.

### **Constructions of *P. aeruginosa* gene deletion and complementary mutants**

The upstream fragment of target gene was amplified by primer-1 and primer-2, the downstream fragment of the target gene was amplified by primer-3 and primer-4 (Supplementary Table 4), and then both fragments were fused into a pK18-Gm-mobsacB

plasmid (71) and transformed into the *P. aeruginosa* PAO1 wild-type strain to delete the target gene as previously described (71). PCR and sequencing were used to confirm the selected mutant strains (Supplementary Table 5).

To complement the *P. aeruginosa clpV1* mutant, a DNA fragment from the *clpV1* upstream 22 bps to the downstream 31 bps was amplified by primers *clpV1-up* and *clpV1-down* (Supplementary Table 4) and double-digested by *Bam*HI and *Hind*III. The purified fragment was ligated with the pUCP22 vector (72), which was digested by the same restriction enzymes to construct the pUCP22-*clpV1* complementary plasmid. After verification by sequencing, the pUCP22-*clpV1* plasmid was transformed into the *P. aeruginosa ΔclpV1* mutant by electroporation to construct a *clpV1* complementary strain.

### Confocal microscopy imaging

*P. aeruginosa* PAO1-GFP-containing planktonic cultures and biofilm cultures (the same samples as those used for the fluorescence based population assay) were stained with 5 μM SYTO<sup>TM</sup> 62 Red fluorescent nucleic acid stain (Molecular probe) to stain all cells for 15 min before 5 ul of each sample was aliquot onto the glass slide and covered with cover slip. The samples were visualized and confocal images were acquired using confocal laser scanning microscopy (CLSM) Zeiss LSM 780 (Carl Zeiss, Germany) with a 63× 1.40 DICII objective. Green and red fluorescence were observed upon 488 nm and 633 nm excitation wavelengths, respectively.

### References

1. Hall-Stoodley L, Costerton JW, Stoodley P. 2004. Bacterial biofilms: from the natural environment to infectious diseases. *Nat Rev Microbiol* 2:95-108.
2. Flemming HC, Wingender J. 2010. The biofilm matrix. *Nature Reviews Microbiology* 8:623-633.
3. Costerton JW, Stewart PS, Greenberg EP. 1999. Bacterial biofilms: a common cause of persistent infections. *Science* 284:1318-22.
4. Harmsen M, Yang L, Pamp SJ, Tolker-Nielsen T. 2010. An update on *Pseudomonas aeruginosa* biofilm formation, tolerance, and dispersal. *FEMS Immunology & Medical Microbiology* 59:253-268.

- 477 5. Banin E, Vasil ML, Greenberg EP. 2005. Iron and *Pseudomonas aeruginosa* biofilm  
478 formation. *Proceedings of the National Academy of Sciences of the United States of*  
479 *America* 102:11076-11081.
- 480 6. O'Toole GA, Kolter R. 1998. Flagellar and twitching motility are necessary for  
481 *Pseudomonas aeruginosa* biofilm development. *Molecular Microbiology* 30:295-304.
- 482 7. Mulcahy LR, Isabella VM, Lewis K. 2014. *Pseudomonas aeruginosa* biofilms in disease.  
483 *Microb Ecol* 68:1-12.
- 484 8. Lewis K. 2001. Riddle of biofilm resistance. *Antimicrobial Agents and Chemotherapy*  
485 45:999-1007.
- 486 9. Hardalo C, Edberg SC. 1997. *Pseudomonas aeruginosa*: assessment of risk from  
487 drinking water. *Crit Rev Microbiol* 23:47-75.
- 488 10. Walker TS, Bais HP, Deziel E, Schweizer HP, Rahme LG, Fall R, Vivanco JM. 2004.  
489 *Pseudomonas aeruginosa*-plant root interactions. Pathogenicity, biofilm formation,  
490 and root exudation. *Plant Physiol* 134:320-31.
- 491 11. Gupta G, Panwar J, Jha PN. 2013. Natural occurrence of *Pseudomonas aeruginosa*, a  
492 dominant cultivable diazotrophic endophytic bacterium colonizing *Pennisetum*  
493 *glauca* (L.) R. Br. *Applied Soil Ecology* 64:252-261.
- 494 12. Beaume M, Kohler T, Fontana T, Tognon M, Renzoni A, van Delden C. 2015.  
495 Metabolic pathways of *Pseudomonas aeruginosa* involved in competition with  
496 respiratory bacterial pathogens. *Frontiers in Microbiology* 6.
- 497 13. Hotterbeekx A, Kumar-Singh S, Goossens H, Malhotra-Kumar S. 2017. In vivo and In  
498 vitro Interactions between *Pseudomonas aeruginosa* and *Staphylococcus* spp.  
499 *Frontiers in Cellular and Infection Microbiology* 7.
- 500 14. Hogan DA, Kolter R. 2002. *Pseudomonas*-*Candida* interactions: An ecological role for  
501 virulence factors. *Science* 296:2229-2232.
- 502 15. Mashburn LM, Jett AM, Akins DR, Whiteley M. 2005. *Staphylococcus aureus* serves  
503 as an iron source for *Pseudomonas aeruginosa* during in vivo coculture. *Journal of*  
504 *Bacteriology* 187:554-566.
- 505 16. Filkins LM, Graber JA, Olson DG, Dolben EL, Lynd LR, Bhujji S, O'Toole GA. 2015.  
506 Coculture of *Staphylococcus aureus* with *Pseudomonas aeruginosa* Drives S-aureus  
507 towards Fermentative Metabolism and Reduced Viability in a Cystic Fibrosis Model.  
508 *Journal of Bacteriology* 197:2252-2264.
- 509 17. Mowat E, Rajendran R, Williams C, McCulloch E, Jones B, Lang S, Ramage G. 2010.  
510 *Pseudomonas aeruginosa* and their small diffusible extracellular molecules inhibit  
511 *Aspergillus fumigatus* biofilm formation. *Fems Microbiology Letters* 313:96-102.
- 512 18. Qin ZQ, Yang L, Qu D, Molin S, Tolker-Nielsen T. 2009. *Pseudomonas aeruginosa*  
513 extracellular products inhibit staphylococcal growth, and disrupt established biofilms  
514 produced by *Staphylococcus epidermidis*. *Microbiology-Sgm* 155:2148-2156.
- 515 19. An DD, Danhorn T, Fuqua C, Parsek MR. 2006. Quorum sensing and motility mediate  
516 interactions between *Pseudomonas aeruginosa* and *Agrobacterium tumefaciens* in  
517 biofilm cocultures. *Proceedings of the National Academy of Sciences of the United*  
518 *States of America* 103:3828-3833.

- 519 20. Fernandez-Pinar R, Camara M, Dubern JF, Ramos JL, Espinosa-Urgel M. 2011. The  
520 *Pseudomonas aeruginosa* quinolone quorum sensing signal alters the multicellular  
521 behaviour of *Pseudomonas putida* KT2440. *Research in Microbiology* 162:773-781.
- 522 21. Reen FJ, Mooij MJ, Holcombe LJ, McSweeney CM, McGlacken GP, Morrissey JP,  
523 O'Gara F. 2011. The *Pseudomonas* quinolone signal (PQS), and its precursor HHQ,  
524 modulate interspecies and interkingdom behaviour. *Fems Microbiology Ecology*  
525 77:413-428.
- 526 22. Irie Y, O'Toole GA, Yuk MH. 2005. *Pseudomonas aeruginosa* rhamnolipids disperse  
527 *Bordetella bronchiseptica* biofilms. *Fems Microbiology Letters* 250:237-243.
- 528 23. Davies DG, Marques CNH. 2009. A Fatty Acid Messenger Is Responsible for Inducing  
529 Dispersion in Microbial Biofilms. *Journal of Bacteriology* 191:1393-1403.
- 530 24. Hibbing ME, Fuqua C, Parsek MR, Peterson SB. 2010. Bacterial competition: surviving  
531 and thriving in the microbial jungle. *Nat Rev Microbiol* 8:15-25.
- 532 25. Dietrich LEP, Teal TK, Price-Whelan A, Newman DK. 2008. Redox-active antibiotics  
533 control gene expression and community behavior in divergent bacteria. *Science*  
534 321:1203-1206.
- 535 26. Russell AB, Hood RD, Bui NK, LeRoux M, Vollmer W, Mougous JD. 2011. Type VI  
536 secretion delivers bacteriolytic effectors to target cells. *Nature* 475:343-7.
- 537 27. Trejo-Hernandez A, Andrade-Dominguez A, Hernandez M, Encarnacion S. 2014.  
538 Interspecies competition triggers virulence and mutability in *Candida*  
539 *albicans*-*Pseudomonas aeruginosa* mixed biofilms. *Isme Journal* 8:1974-1988.
- 540 28. Elias S, Banin E. 2012. Multi-species biofilms: living with friendly neighbors. *FEMS*  
541 *Microbiol Rev* 36:990-1004.
- 542 29. Fortina P, Surrey S. 2008. Digital mRNA profiling. *Nat Biotechnol* 26:293-4.
- 543 30. Veldman-Jones MH, Lai Z, Wappett M, Harbron CG, Barrett JC, Harrington EA, Thress  
544 KS. 2015. Reproducible, Quantitative, and Flexible Molecular Subtyping of Clinical  
545 DLBCL Samples Using the NanoString nCounter System. *Clin Cancer Res* 21:2367-78.
- 546 31. Gjodsbol K, Christensen JJ, Karlsmark T, Jorgensen B, Klein BM, Krogfelt KA. 2006.  
547 Multiple bacterial species reside in chronic wounds: a longitudinal study. *Int Wound*  
548 *J* 3:225-31.
- 549 32. Watnick P, Kolter R. 2000. Biofilm, city of microbes. *Journal of Bacteriology*  
550 182:2675-2679.
- 551 33. Rigatto MH, Ribeiro VB, Konzen D, Zavascki AP. 2013. Comparison of polymyxin B  
552 with other antimicrobials in the treatment of ventilator-associated pneumonia and  
553 tracheobronchitis caused by *Pseudomonas aeruginosa* or *Acinetobacter baumannii*.  
554 *Infection* 41:321-8.
- 555 34. Govan JR, Deretic V. 1996. Microbial pathogenesis in cystic fibrosis: mucoid  
556 *Pseudomonas aeruginosa* and *Burkholderia cepacia*. *Microbiol Rev* 60:539-74.
- 557 35. Falagas ME, Bliziotis IA. 2007. Pandrug-resistant Gram-negative bacteria: the dawn  
558 of the post-antibiotic era? *Int J Antimicrob Agents* 29:630-6.
- 559 36. Hoffman LR, Deziel E, D'Argenio DA, Lepine F, Emerson J, McNamara S, Gibson RL,  
560 Ramsey BW, Miller SI. 2006. Selection for *Staphylococcus aureus* small-colony  
561 variants due to growth in the presence of *Pseudomonas aeruginosa*. *Proc Natl Acad*  
562 *Sci U S A* 103:19890-5.

- 563 37. Rahme LG, Stevens EJ, Wolfort SF, Shao J, Tompkins RG, Ausubel FM. 1995. Common  
564 virulence factors for bacterial pathogenicity in plants and animals. *Science*  
565 268:1899-902.
- 566 38. Geiss GK, Bumgarner RE, Birditt B, Dahl T, Dowidar N, Dunaway DL, Fell HP, Ferree S,  
567 George RD, Grogan T, James JJ, Maysuria M, Mitton JD, Oliveri P, Osborn JL, Peng T,  
568 Ratcliffe AL, Webster PJ, Davidson EH, Hood L, Dimitrov K. 2008. Direct multiplexed  
569 measurement of gene expression with color-coded probe pairs. *Nat Biotechnol*  
570 26:317-25.
- 571 39. Mougous JD, Cuff ME, Raunser S, Shen A, Zhou M, Gifford CA, Goodman AL,  
572 Joachimiak G, Ordonez CL, Lory S, Walz T, Joachimiak A, Mekalanos JJ. 2006. A  
573 virulence locus of *Pseudomonas aeruginosa* encodes a protein secretion apparatus.  
574 *Science* 312:1526-1530.
- 575 40. Hood RD, Singh P, Hsu FS, Guvener T, Carl MA, Trinidad RRS, Silverman JM, Ohlson  
576 BB, Hicks KG, Plemel RL, Li M, Schwarz S, Wang WY, Merz AJ, Goodlett DR, Mougous  
577 JD. 2010. A Type VI Secretion System of *Pseudomonas aeruginosa* Targets, a Toxin to  
578 Bacteria. *Cell Host & Microbe* 7:25-37.
- 579 41. Sana TG, Berni B, Bleves S. 2016. The T6SSs of *Pseudomonas aeruginosa* Strain PAO1  
580 and Their Effectors: Beyond Bacterial-Cell Targeting. *Front Cell Infect Microbiol* 6:61.
- 581 42. Colvin KM, Gordon VD, Murakami K, Borlee BR, Wozniak DJ, Wong GC, Parsek MR.  
582 2011. The pel polysaccharide can serve a structural and protective role in the biofilm  
583 matrix of *Pseudomonas aeruginosa*. *PLoS Pathog* 7:e1001264.
- 584 43. Colvin KM, Irie Y, Tart CS, Urbano R, Whitney JC, Ryder C, Howell PL, Wozniak DJ,  
585 Parsek MR. 2012. The Pel and Psl polysaccharides provide *Pseudomonas aeruginosa*  
586 structural redundancy within the biofilm matrix. *Environ Microbiol* 14:1913-28.
- 587 44. Jennings LK, Storek KM, Ledvina HE, Coulon C, Marmont LS, Sadovskaya I, Secor PR,  
588 Tseng BS, Scian M, Filloux A, Wozniak DJ, Howell PL, Parsek MR. 2015. Pel is a  
589 cationic exopolysaccharide that cross-links extracellular DNA in the *Pseudomonas*  
590 *aeruginosa* biofilm matrix. *Proc Natl Acad Sci U S A* 112:11353-8.
- 591 45. Klausen M, Heydorn A, Ragas P, Lambertsen L, Aaes-Jorgensen A, Molin S,  
592 Tolker-Nielsen T. 2003. Biofilm formation by *Pseudomonas aeruginosa* wild type,  
593 flagella and type IV pili mutants. *Molecular Microbiology* 48:1511-1524.
- 594 46. Periasamy S, Nair HA, Lee KW, Ong J, Goh JQ, Kjelleberg S, Rice SA. 2015.  
595 *Pseudomonas aeruginosa* PAO1 exopolysaccharides are important for mixed species  
596 biofilm community development and stress tolerance. *Front Microbiol* 6:851.
- 597 47. de Kievit TR. 2009. Quorum sensing in *Pseudomonas aeruginosa* biofilms.  
598 *Environmental Microbiology* 11:279-288.
- 599 48. Hentzer M, Riedel K, Rasmussen TB, Heydorn A, Andersen JB, Parsek MR, Rice SA,  
600 Eberl L, Molin S, Hoiby N, Kjelleberg S, Givskov M. 2002. Inhibition of quorum  
601 sensing in *Pseudomonas aeruginosa* biofilm bacteria by a halogenated furanone  
602 compound. *Microbiology-Sgm* 148:87-102.
- 603 49. Hentzer M, Wu H, Andersen JB, Riedel K, Rasmussen TB, Bagge N, Kumar N,  
604 Schembri MA, Song Z, Kristoffersen P, Manefield M, Costerton JW, Molin S, Eberl L,  
605 Steinberg P, Kjelleberg S, Hoiby N, Givskov M. 2003. Attenuation of *Pseudomonas*  
606 *aeruginosa* virulence by quorum sensing inhibitors. *EMBO J* 22:3803-15.



- 607 50. O'Loughlin CT, Miller LC, Siryaporn A, Drescher K, Semmelhack MF, Bassler BL. 2013.  
608 A quorum-sensing inhibitor blocks *Pseudomonas aeruginosa* virulence and biofilm  
609 formation. *Proceedings of the National Academy of Sciences of the United States of*  
610 *America* 110:17981-17986.
- 611 51. Christensen LD, van Gennip M, Jakobsen TH, Alhede M, Hougen HP, Hoiby N,  
612 Bjarsholt T, Givskov M. 2012. Synergistic antibacterial efficacy of early combination  
613 treatment with tobramycin and quorum-sensing inhibitors against *Pseudomonas*  
614 *aeruginosa* in an intraperitoneal foreign-body infection mouse model. *Journal of*  
615 *Antimicrobial Chemotherapy* 67:1198-1206.
- 616 52. Hentzer M, Eberl L, Nielsen J, Givskov M. 2003. Quorum sensing - A novel target for  
617 the treatment of biofilm infections. *Biodrugs* 17:241-250.
- 618 53. Cowell BA, Twining SS, Hobden JA, Kwong MS, Fleiszig SM. 2003. Mutation of *lasA*  
619 and *lasB* reduces *Pseudomonas aeruginosa* invasion of epithelial cells. *Microbiology*  
620 149:2291-9.
- 621 54. Duan K, Dammel C, Stein J, Rabin H, Surette MG. 2003. Modulation of *Pseudomonas*  
622 *aeruginosa* gene expression by host microflora through interspecies communication.  
623 *Mol Microbiol* 50:1477-91.
- 624 55. Biswas L, Biswas R, Schlag M, Bertram R, Gotz F. 2009. Small-colony variant selection  
625 as a survival strategy for *Staphylococcus aureus* in the presence of *Pseudomonas*  
626 *aeruginosa*. *Appl Environ Microbiol* 75:6910-2.
- 627 56. Whiley RA, Sheikh NP, Mushtaq N, Hagi-Pavli E, Personne Y, Javaid D, Waite RD.  
628 2014. Differential potentiation of the virulence of the *Pseudomonas aeruginosa*  
629 cystic fibrosis liverpool epidemic strain by oral commensal *Streptococci*. *J Infect Dis*  
630 209:769-80.
- 631 57. Korgaonkar A, Trivedi U, Rumbaugh KP, Whiteley M. 2013. Community surveillance  
632 enhances *Pseudomonas aeruginosa* virulence during polymicrobial infection. *Proc*  
633 *Natl Acad Sci U S A* 110:1059-64.
- 634 58. Lesic B, Starkey M, He J, Hazan R, Rahme LG. 2009. Quorum sensing differentially  
635 regulates *Pseudomonas aeruginosa* type VI secretion locus I and homologous loci II  
636 and III, which are required for pathogenesis. *Microbiology* 155:2845-55.
- 637 59. Mah TF, Pitts B, Pellock B, Walker GC, Stewart PS, O'Toole GA. 2003. A genetic basis  
638 for *Pseudomonas aeruginosa* biofilm antibiotic resistance. *Nature* 426:306-310.
- 639 60. Rogers GB, van der Gast CJ, Serisier DJ. 2015. Predominant pathogen competition  
640 and core microbiota divergence in chronic airway infection. *ISME J* 9:217-25.
- 641 61. Flanagan JL, Brodie EL, Weng L, Lynch SV, Garcia O, Brown R, Hugenholtz P, DeSantis  
642 TZ, Andersen GL, Wiener-Kronish JP, Bristow J. 2007. Loss of bacterial diversity  
643 during antibiotic treatment of intubated patients colonized with *Pseudomonas*  
644 *aeruginosa*. *J Clin Microbiol* 45:1954-62.
- 645 62. D'Argenio DA, Calfee MW, Rainey PB, Pesci EC. 2002. Autolysis and autoaggregation  
646 in *Pseudomonas aeruginosa* colony morphology mutants. *Journal of Bacteriology*  
647 184:6481-6489.
- 648 63. Allsopp LP, Wood TE, Howard SA, Maggiorelli F, Nolan LM, Wettstadt S, Filloux A.  
649 2017. *RsmA* and *AmrZ* orchestrate the assembly of all three type VI secretion  
650 systems in *Pseudomonas aeruginosa*. *Proc Natl Acad Sci U S A* 114:7707-7712.

- 651 64. Armbruster CR, Wolter DJ, Mishra M, Hayden HS, Radey MC, Merrihew G, MacCoss  
652 MJ, Burns J, Wozniak DJ, Parsek MR, Hoffman LR. 2016. Staphylococcus aureus  
653 Protein A Mediates Interspecies Interactions at the Cell Surface of Pseudomonas  
654 aeruginosa. MBio 7.
- 655 65. Lee KW, Periasamy S, Mukherjee M, Xie C, Kjelleberg S, Rice SA. 2014. Biofilm  
656 development and enhanced stress resistance of a model, mixed-species community  
657 biofilm. ISME J 8:894-907.
- 658 66. Pamp SJ, Gjermansen M, Johansen HK, Tolker-Nielsen T. 2008. Tolerance to the  
659 antimicrobial peptide colistin in Pseudomonas aeruginosa biofilms is linked to  
660 metabolically active cells, and depends on the pmr and mexAB-oprM genes. Mol  
661 Microbiol 68:223-40.
- 662 67. Love MI, Huber W, Anders S. 2014. Moderated estimation of fold change and  
663 dispersion for RNA-seq data with DESeq2. Genome Biol 15:550.
- 664 68. Gentleman RC, Carey VJ, Bates DM, Bolstad B, Dettling M, Dudoit S, Ellis B, Gautier L,  
665 Ge Y, Gentry J, Hornik K, Hothorn T, Huber W, Iacus S, Irizarry R, Leisch F, Li C,  
666 Maechler M, Rossini AJ, Sawitzki G, Smith C, Smyth G, Tierney L, Yang JY, Zhang J.  
667 2004. Bioconductor: open software development for computational biology and  
668 bioinformatics. Genome Biol 5:R80.
- 669 69. Huson DH, Beier S, Flade I, Gorska A, El-Hadidi M, Mitra S, Ruscheweyh HJ, Tappu R.  
670 2016. MEGAN Community Edition - Interactive Exploration and Analysis of  
671 Large-Scale Microbiome Sequencing Data. Plos Computational Biology 12.
- 672 70. Lambertsen L, Sternberg C, Molin S. 2004. Mini-Tn7 transposons for site-specific  
673 tagging of bacteria with fluorescent proteins. Environ Microbiol 6:726-32.
- 674 71. Lee J, Wu J, Deng Y, Wang J, Wang C, Wang J, Chang C, Dong Y, Williams P, Zhang LH.  
675 2013. A cell-cell communication signal integrates quorum sensing and stress  
676 response. Nat Chem Biol 9:339-43.
- 677 72. Olsen RH DG, McCombie WR. 1982. Development of broad-host-range vectors and  
678 gene banks: self-cloning of the Pseudomonas aeruginosa PAO chromosome. Journal  
679 of Bacteriology 150:60-9.

## 680 Acknowledgements

681 This research was supported by the National Research Foundation and Ministry of Education  
682 Singapore under its Research Centre of Excellence Program and AcRF Tier 2  
683 (MOE2016-T2-1-010) from Ministry of Education, Singapore. We appreciate Professor Zhang  
684 Lian-Hui to provide us the pK18-Gm-mobsacB plasmid. We thank Dr. Daniela Moses, Mr. Yap  
685 Zhei Hwee, Rikky Wenang Purbojati and Mr. Muhammad Hafiz Bin Ismail for help with the  
686 RNA-seq experiments.



## 687 **Author contributions**

688 Y. C. designed and carried out experiments, interpreted results and wrote the manuscript. L.  
689 Y. designed the project and revised the manuscript. J. K. H. Y. helped with the confocal  
690 microscopy imaging and biofilm bioreactors. Z. C. performed metatranscriptomic analysis. Y.  
691 D., L. Z. and Y. D. helped to revise the manuscript.

## 692 **Conflict of Interest**

693 The authors declare no conflict of interest.

## 694 **Electronic supplementary material**

695 Supplementary information is available at Applied and Environmental Microbiology's  
696 website.

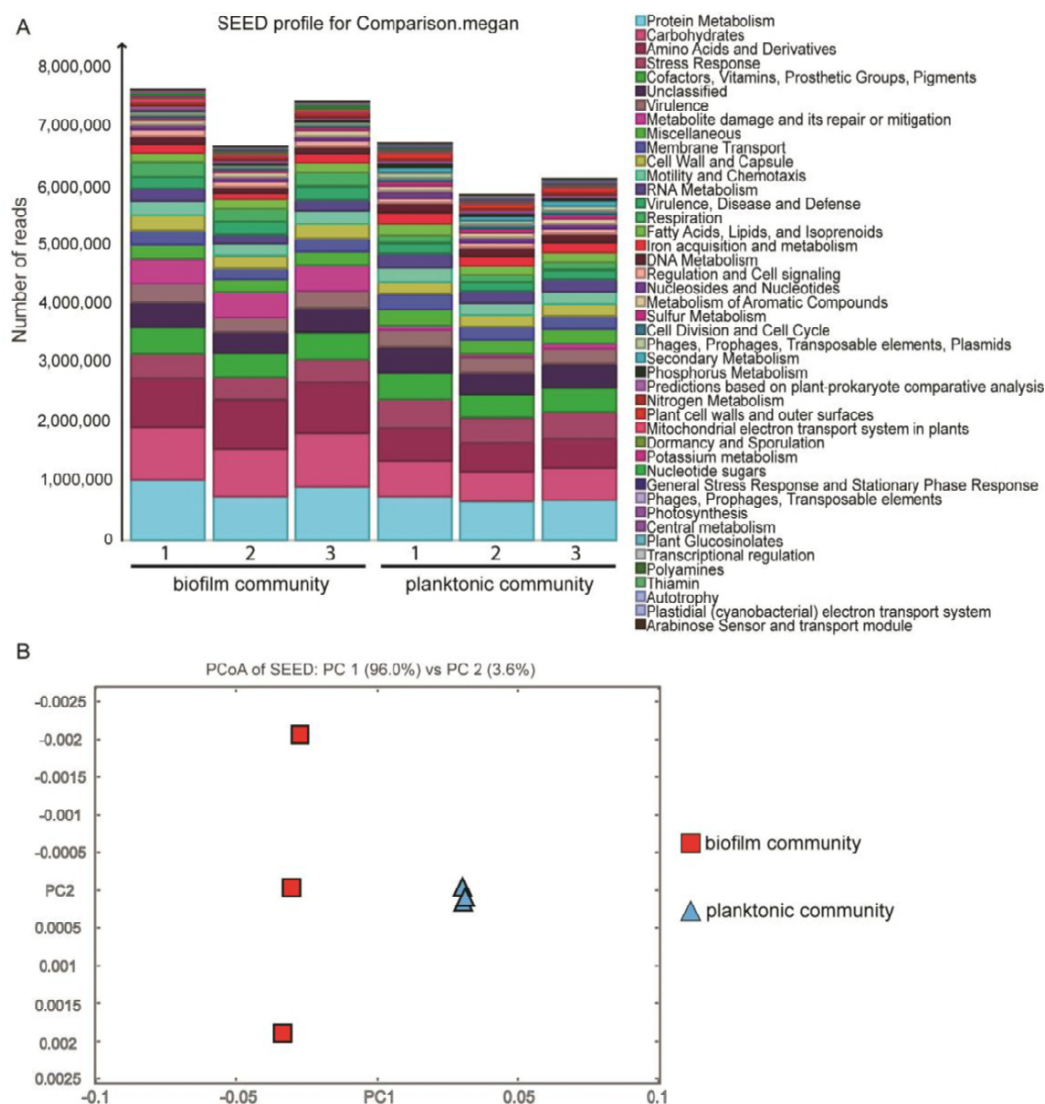

**Figure 1. Metatranscriptomics comparison between mixed-species planktonic community and biofilm community modes.** A) Functional classification by SEED. The comparison was based on read counts with a minimum quality score cut-off of 50 and a top percentage of 25. Different colours corresponding to different functions are ranked in the right column. B) Clustering by PCoA based on SEED classification using Bray-Curtis dissimilarity.

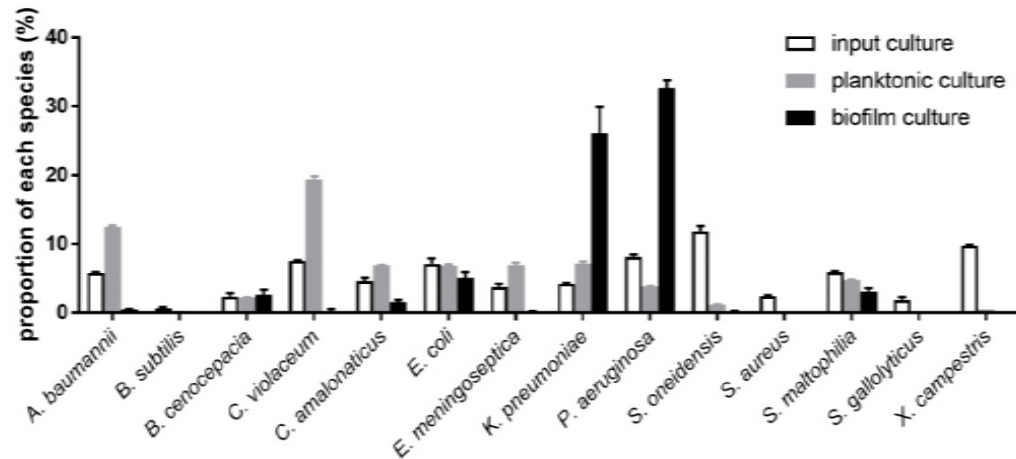

**Figure 2. Normalized population dynamics of each species in the mixed-species microbial communities.** The input culture is the mixture of all species mixed at equal OD<sub>600</sub> amounts at the starting point for both planktonic and biofilm incubation. Grey bars indicate the proportion of each species in the 24 h-incubated planktonic microbial community. The black bars show the population dynamics of each species in the 5-day biofilm microbial community.

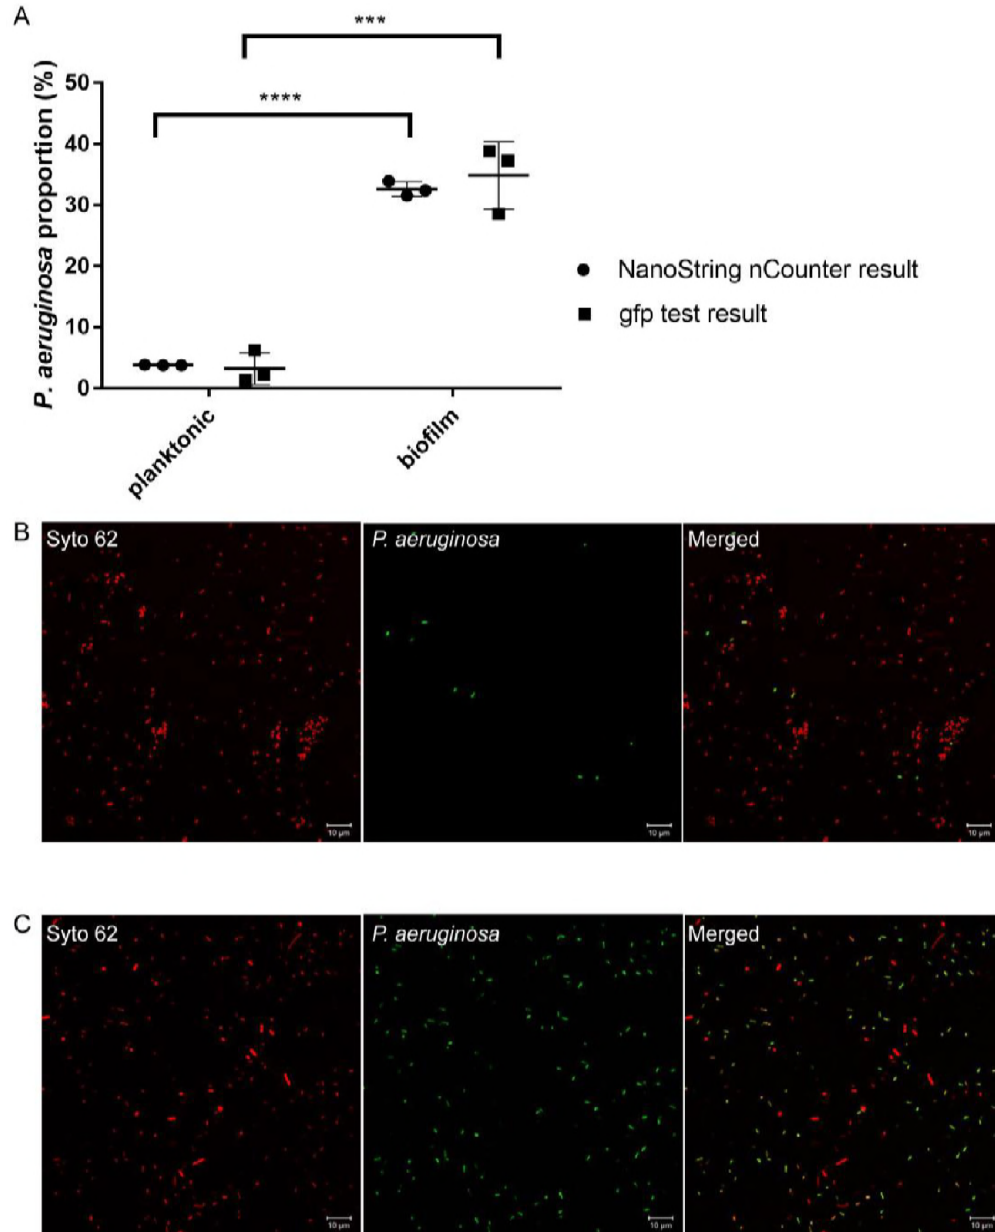

**Figure 3. Proportions of *P. aeruginosa* in the mixed-species microbial communities. A)**

Circular dots indicate three biological replicates of *P. aeruginosa* normalized proportions in both the planktonic and biofilm communities as measured by NanoString nCounter® 16S rRNA array; the square dots show three biological replicates of *P. aeruginosa* proportions in mixed-species microbial communities as calculated by fluorescence-based proportion test. The lines show the average values and standard deviation. Comparison was performed by t-test with  $p < 0.05$ . B) Confocal images of the resuspended 24 h-incubated mixed-species planktonic microbial community containing GFP-tagged *P. aeruginosa*. C) Confocal images of the resuspended 5-day mixed-species biofilm community containing GFP-tagged *P. aeruginosa*. Green cells show the GFP-tagged *P. aeruginosa*, red cells show all the living cells stained with Syto62.

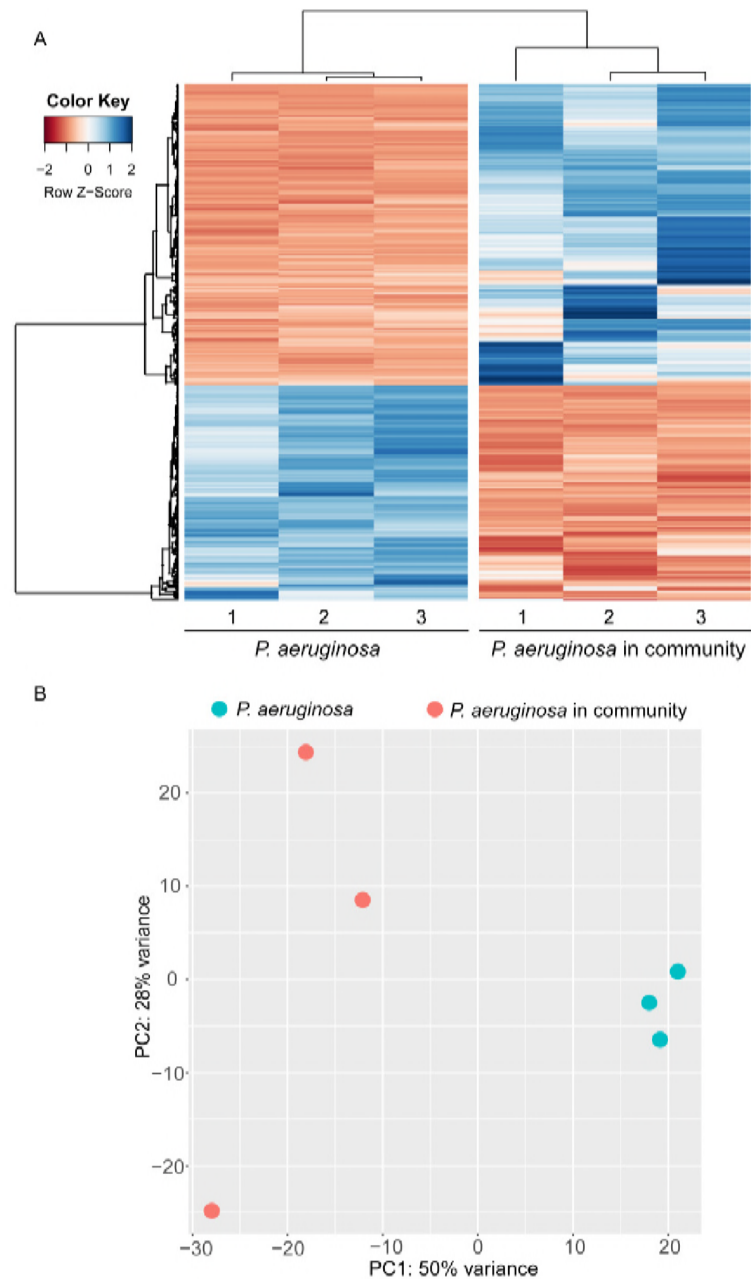

36

37

38

39

40

41

42

43

44

45

46

**Figure 4. Transcriptomic comparison of *P. aeruginosa* between mono-species biofilm cells and the mixed-species biofilm community.** A) A heat map representing *P. aeruginosa* genes expression level up- or downregulated more than 2-fold in the mixed-species biofilm compared to the mono-species biofilm. The Z-Score shows the standardization of each gene expression level between the two different groups. Detailed information on this regulation is listed in Supplementary Table 3. B) A principal component analysis (PCA) shows that the expression profiles of *P. aeruginosa* between the mono-species biofilm and it in the mixed-species biofilm are different. Each dot indicates one biological replicate with different colours representing the sample source.

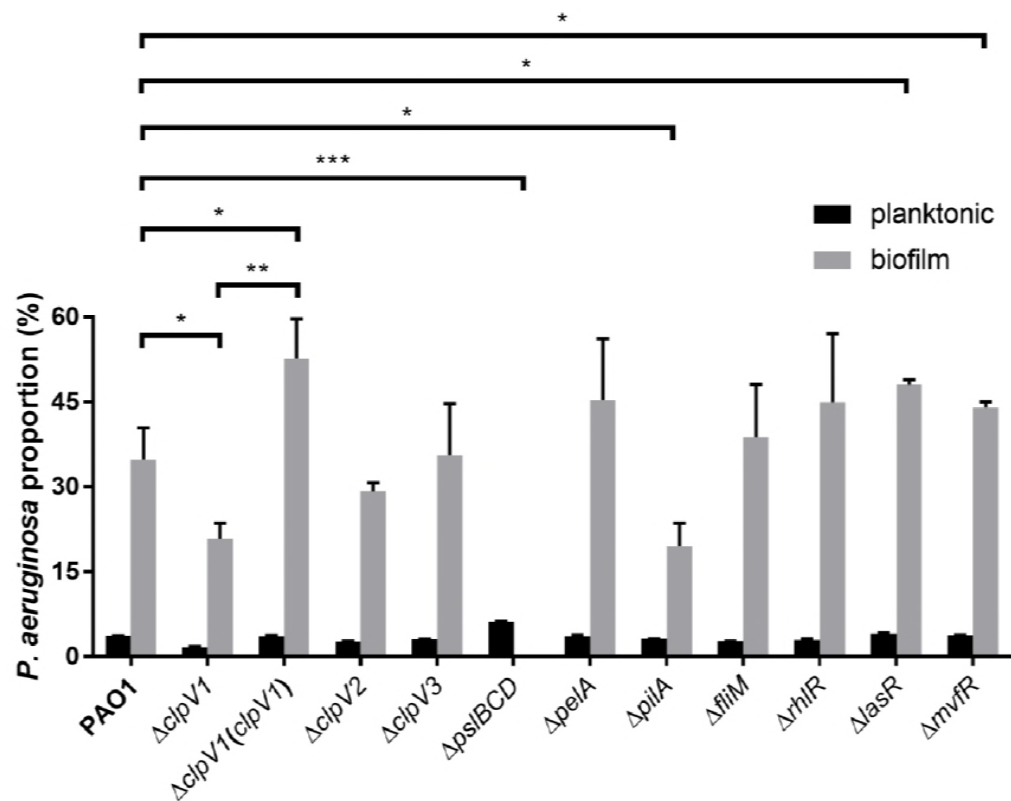

48

49

50

51

52

53

54

55

56

57

58

59

60

61

62

63

64

65

66

67

68

69

**Figure 5. *P. aeruginosa* population dynamics in the mixed-species biofilm community affected by H1-T6SS and biofilm formation determinants.** Each column shows the population dynamics of GFP-tagged *P. aeruginosa* parental strain PAO1 and the knockout mutants in the mixed-species microbial planktonic (black) and biofilm (grey) communities at different heights with the standard deviation of three biological replicates. The asterisk indicates statistical significance by t-test with  $p < 0.05$ .

70 **Table 1. 16S rRNA sequencing feasibility detection.** Three different random mixed groups were named “I”, “II” and “III” in this table. Numbers indicate the  
71 ratio of one species in the mixed group with unit %. “Reads percentage” is 16S rRNA sequencing analysis result; “RNA percentage” shows proportion of  
72 single species total RNA in mixture. “Fold” calculated from average values of ratio in Reads percentage to it in RNA percentage. Dash in RNA percentage  
73 means no RNA was mixed into the random mixture sample, so some of average fold values and standard deviations cannot be calculated, also labelled  
74 with dash.  
75

|                         | Reads percentage (%) |       |       | RNA percentage (%) |       |       | Fold (normalization factor) |
|-------------------------|----------------------|-------|-------|--------------------|-------|-------|-----------------------------|
|                         | I                    | II    | III   | I                  | II    | III   |                             |
| <i>A. baumannii</i>     | 3.13                 | 6.52  | 1.09  | 1.95               | 3.71  | 1.92  | 1.31 ±0.65                  |
| <i>B. subtilis</i>      | 0.18                 | 0.07  | 0.06  | 0.11               | 0.10  | 0.10  | 1.00 ±0.61                  |
| <i>B. cenocepacia</i>   | 3.88                 | 0.54  | 1.01  | 1.93               | 1.76  | 9.55  | 0.81 ±1.04                  |
| <i>C. violaceum</i>     | 16.94                | 3.43  | 3.05  | 21.48              | 9.77  | 10.60 | 0.48 ±0.27                  |
| <i>C. amalonaticus</i>  | 7.56                 | 6.36  | 0.10  | 11.45              | 20.84 | -     | 0.48 ±0.25                  |
| <i>E. coli</i>          | 2.10                 | 2.50  | 0.97  | 1.88               | 6.83  | 3.71  | 0.58 ±0.47                  |
| <i>E. anophelis</i>     | 0.87                 | 0.00  | 0.00  | 0.41               | -     | -     | 2.10 ±-                     |
| <i>K. pneumoniae</i>    | 6.90                 | 0.29  | 0.11  | 40.48              | -     | -     | 0.17 ±-                     |
| <i>L. monocytogenes</i> | 0.01                 | 0.02  | 0.03  | -                  | -     | -     | -                           |
| <i>P. aeruginosa</i>    | 23.28                | 47.95 | 72.63 | 6.53               | 29.69 | 57.95 | 2.14 ±1.24                  |
| <i>P. fluorescens</i>   | 0.44                 | 0.92  | 1.46  | -                  | -     | -     | -                           |
| <i>P. putida</i>        | 2.22                 | 4.98  | 6.13  | -                  | -     | -     | -                           |
| <i>P. syringae</i>      | 0.01                 | 0.01  | 0.01  | -                  | -     | -     | -                           |
| <i>S. oneidensis</i>    | 0.28                 | 0.35  | 0.24  | 1.24               | 2.25  | 2.44  | 0.16 ±0.06                  |
| <i>S. aureus</i>        | 13.24                | 5.18  | 2.09  | 3.73               | 3.40  | 1.84  | 2.07 ±1.30                  |
| <i>S. maltophilia</i>   | 0.47                 | 0.01  | 0.00  | 0.59               | -     | -     | 0.79 ±-                     |
| <i>S. gallolyticus</i>  | 2.67                 | 10.34 | 0.91  | 0.58               | 4.25  | 0.58  | 2.86 ±1.54                  |
| <i>X. campestris</i>    | 15.82                | 10.52 | 10.10 | 7.65               | 17.40 | 11.32 | 1.19 ±0.78                  |

76

77 **Table 2. Part of *P. aeruginosa* regulated genes in mixed-species biofilm community.**

78

| Locus tag | Gene name    | Fold change | p value  | Product                              | Pathway |
|-----------|--------------|-------------|----------|--------------------------------------|---------|
| PA0070    | <i>tagQ1</i> | 2.66        | 1.20E-09 | TagQ1                                | H1-T6SS |
| PA0074    | <i>ppkA</i>  | 2.06        | 1.77E-04 | serine/threonine protein kinase PpkA | H1-T6SS |
| PA0077    | <i>icmF1</i> | 2.43        | 2.68E-07 | IcmF1                                | H1-T6SS |
| PA0079    | <i>tssK1</i> | 2.06        | 4.11E-04 | TssK1                                | H1-T6SS |
| PA0082    | <i>tssA1</i> | 2.27        | 5.28E-04 | TssA1                                | H1-T6SS |
| PA0083    | <i>tssB1</i> | 5.34        | 1.81E-23 | TssB1                                | H1-T6SS |
| PA0084    | <i>tssC1</i> | 5.24        | 1.51E-31 | TssC1                                | H1-T6SS |
| PA0085    | <i>hcp1</i>  | 4.82        | 1.20E-52 | Hcp1                                 | H1-T6SS |
| PA0086    | <i>tagJ1</i> | 2.43        | 4.84E-04 | TagJ1                                | H1-T6SS |
| PA0088    | <i>tssF1</i> | 2.85        | 6.79E-07 | TssF1                                | H1-T6SS |
| PA0089    | <i>tssG1</i> | 2.62        | 8.73E-04 | TssG1                                | H1-T6SS |
| PA0090    | <i>clpV1</i> | 4.96        | 1.52E-21 | ClpV1                                | H1-T6SS |
| PA0091    | <i>vgrG1</i> | 3.53        | 1.57E-12 | VgrG1                                | H1-T6SS |
| PA0092    | <i>tsi6</i>  | 2.4         | 8.41E-04 | Tsi6                                 | H1-T6SS |
| PA0097    | PA0097       | 2.48        | 7.21E-05 | hypothetical protein                 |         |
| PA0099    | PA0099       | 3.61        | 2.72E-15 | type VI effector protein             |         |
| PA0100    | PA0100       | 2.86        | 8.24E-15 | hypothetical protein                 |         |
| PA0260    | <i>tle3</i>  | 2.62        | 2.67E-17 | Tle3                                 | H2-T6SS |
| PA0261    | PA0261       | 2.34        | 2.26E-05 | hypothetical protein                 |         |
| PA0263    | <i>hcpC</i>  | 4.23        | 1.31E-18 | secreted protein Hcp                 |         |
| PA1509    | <i>tplEi</i> | 2.12        | 1.83E-07 | immunity protein TplEi               |         |
| PA1510    | <i>tplE</i>  | 2.8         | 1.54E-12 | type 6 PGAP1-like effector, TplE     | H2-T6SS |
| PA1512    | <i>hcpA</i>  | 3.52        | 1.95E-14 | secreted protein Hcp                 |         |
| PA1657    | <i>tssB2</i> | 3.06        | 7.18E-18 | TssB2                                | H2-T6SS |



|        |               |       |          |                                                    |                   |
|--------|---------------|-------|----------|----------------------------------------------------|-------------------|
| PA1658 | <i>tssC2</i>  | 2.65  | 1.06E-16 | TssC2                                              | H2-T6SS           |
| PA1659 | <i>tssE2</i>  | 2.18  | 8.21E-05 | TssE2                                              | H2-T6SS           |
| PA1661 | <i>tssH2</i>  | 2.35  | 1.57E-06 | TssH2                                              | H2-T6SS           |
| PA1662 | <i>clpV2</i>  | 2.36  | 1.79E-10 | clpV2                                              | H2-T6SS           |
| PA1663 | <i>sfa2</i>   | 2.61  | 5.56E-08 | Sfa2                                               | H2-T6SS           |
| PA1665 | <i>fha2</i>   | 2.74  | 3.11E-09 | Fha2                                               | H2-T6SS           |
| PA1666 | <i>lip2</i>   | 3.3   | 2.74E-11 | Lip2                                               | H2-T6SS           |
| PA1667 | <i>tssJ2</i>  | 2.8   | 5.26E-08 | TssJ2                                              | H2-T6SS           |
| PA1668 | <i>dotU2</i>  | 2.27  | 1.18E-05 | DotU2                                              | H2-T6SS           |
| PA1669 | <i>icmF2</i>  | 3.21  | 1.74E-14 | IcmF2                                              | H2-T6SS           |
| PA1844 | <i>tse1</i>   | 2.86  | 1.62E-03 | Tse1                                               | H1-T6SS           |
| PA1845 | <i>tsi1</i>   | 2.81  | 4.93E-04 | Tsi1                                               | H1-T6SS           |
| PA2365 | <i>tssB3</i>  | 3.78  | 6.97E-22 | TssB3                                              | H3-T6SS           |
| PA2366 | <i>tssC3</i>  | 3.75  | 1.81E-37 | TssC3                                              | H3-T6SS           |
| PA2367 | <i>hcp3</i>   | 3.08  | 1.35E-18 | Hcp3                                               | H3-T6SS           |
| PA2369 | <i>tssG3</i>  | 2     | 1.03E-04 | TssG3                                              | H3-T6SS           |
| PA2371 | <i>clpV3</i>  | 2.11  | 1.07E-08 | ClpV3                                              | H3-T6SS           |
| PA3294 | <i>vgrG4a</i> | 2.17  | 1.02E-03 | VgrG4a                                             | H2-T6SS           |
| PA3484 | <i>tse3</i>   | 2.54  | 6.03E-04 | Tse3                                               | H1-T6SS           |
| PA3479 | <i>rhlA</i>   | -2.35 | 4.99E-07 | rhamnosyltransferase chain A                       | Quorum sensing    |
| PA3478 | <i>rhlB</i>   | -2.17 | 8.81E-07 | rhamnosyltransferase chain B                       | Quorum sensing    |
| PA1871 | <i>lasA</i>   | -2.42 | 1.64E-08 | LasA protease precursor                            | Quorum sensing    |
| PA3724 | <i>lasB</i>   | -2.72 | 3.03E-12 | elastase LasB                                      | Quorum sensing    |
| PA1432 | <i>lasI</i>   | 2.43  | 1.13E-14 | autoinducer synthesis protein LasI                 | Quorum sensing    |
| PA2587 | <i>pqsH</i>   | -2.09 | 3.42E-05 | probable FAD-dependent monooxygenase               | Quorum sensing    |
| PA1078 | <i>flgC</i>   | 2.08  | 1.14E-05 | flagellar basal-body rod protein FlgC              | Flagella assembly |
| PA1079 | <i>flgD</i>   | 2.26  | 2.60E-10 | flagellar basal-body rod modification protein FlgD | Flagella assembly |

|        |             |      |          |      |                                              |
|--------|-------------|------|----------|------|----------------------------------------------|
| PA3059 | <i>pelF</i> | 2.44 | 2.40E-03 | PelF | extracellular polysaccharide<br>biosynthesis |
| PA3058 | <i>pelG</i> | 2.82 | 1.84E-03 | PelG | extracellular polysaccharide<br>biosynthesis |

---

79

80
